# Supplementary material for: Standardization of measurement of cervical elastography, its reproducibility, and analysis of baseline clinical factors affecting elastographic parameters
Source: PubMed Central journal article supplement — Obstet Gynecol Sci. 2019 Dec 27;63(1):42–54. doi: 10.5468/ogs.2020.63.1.42 (PMC6962587; doi:10.5468/ogs.2020.63.1.42), 2019-12-27
Supplement: ogs-63-42-s001.pdf [file ogs-63-42-s001.pdf]

# Obstetrics & Gynecology Science

Hyun-Joo Seol, et al. The cervical elastography during pregnancy

**Supplementary Table 1.** Cervical length and elastographic parameters in cases of short cervix with funneling: a comparison of 2 methods

| Measurements         | To include functional cervix only without funneling area | To include funneling area by the extension of the margin of internal os | P-value <sup>a)</sup> |
|----------------------|----------------------------------------------------------|-------------------------------------------------------------------------|-----------------------|
| Cervical length (cm) | 1.583±0.612                                              | 1.527±0.598                                                             | 0.004                 |
| IOS                  | 0.284±0.085                                              | 0.281±0.080                                                             | 0.337                 |
| EOS                  | 0.290±0.092                                              | 0.291±0.091                                                             | 0.820                 |
| Ratio (IOS/EOS)      | 1.016±0.262                                              | 1.011±0.257                                                             | 0.699                 |
| ECI                  | 3.442±1.260                                              | 3.377±1.224                                                             | 0.264                 |
| Hardness ratio (%)   | 63.696±15.431                                            | 63.903±14.727                                                           | 0.634                 |

Data presented mean ± standard deviation.

IOS, internal os of the cervix; EOS, external os of the cervix; Ratio (IOS/EOS), ratio of the strain of the internal and external os; ECI, elasticity contrast index.

<sup>a)</sup>Paired *t*-test.
